# Supplementary material for: Effects of Supplemental Drugs on Hexaminolevulinate (HAL)-Induced PpIX Fluorescence in Bladder Cancer Cell Suspensions
Source: MDPI journal article supplement (doi:10.3390/ijms23147631), 2022-07-10
Supplement: s1 [file s1]

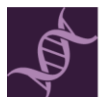

Article

# Effects of Supplemental Drugs on Hexaminolevulinate (HAL)-Induced PpIX Fluorescence in Bladder Cancer Cell Suspensions

Kit Man Chan <sup>1</sup>, Krasimir Vasilev <sup>2</sup> and Melanie MacGregor <sup>3,\*</sup>

<sup>1</sup> UniSA STEM, University of South Australia, Adelaide, SA 5095, Australia; kit\_man.chan@mymail.unisa.edu.au

<sup>2</sup> College of Medicine and Public Health, Flinders University, Bedford Park, SA 5042, Australia; krasimir.vasilev@flinders.edu.au

<sup>3</sup> Flinders Institute for Nanoscale Science & Technology, College of Science and Engineering, Flinders University, Bedford Park, SA 5042, Australia

\* Correspondence: melanie.macgregor@flinders.edu.au; Tel.: +61-8-8201-2574

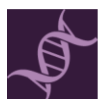

## Supplementary Materials

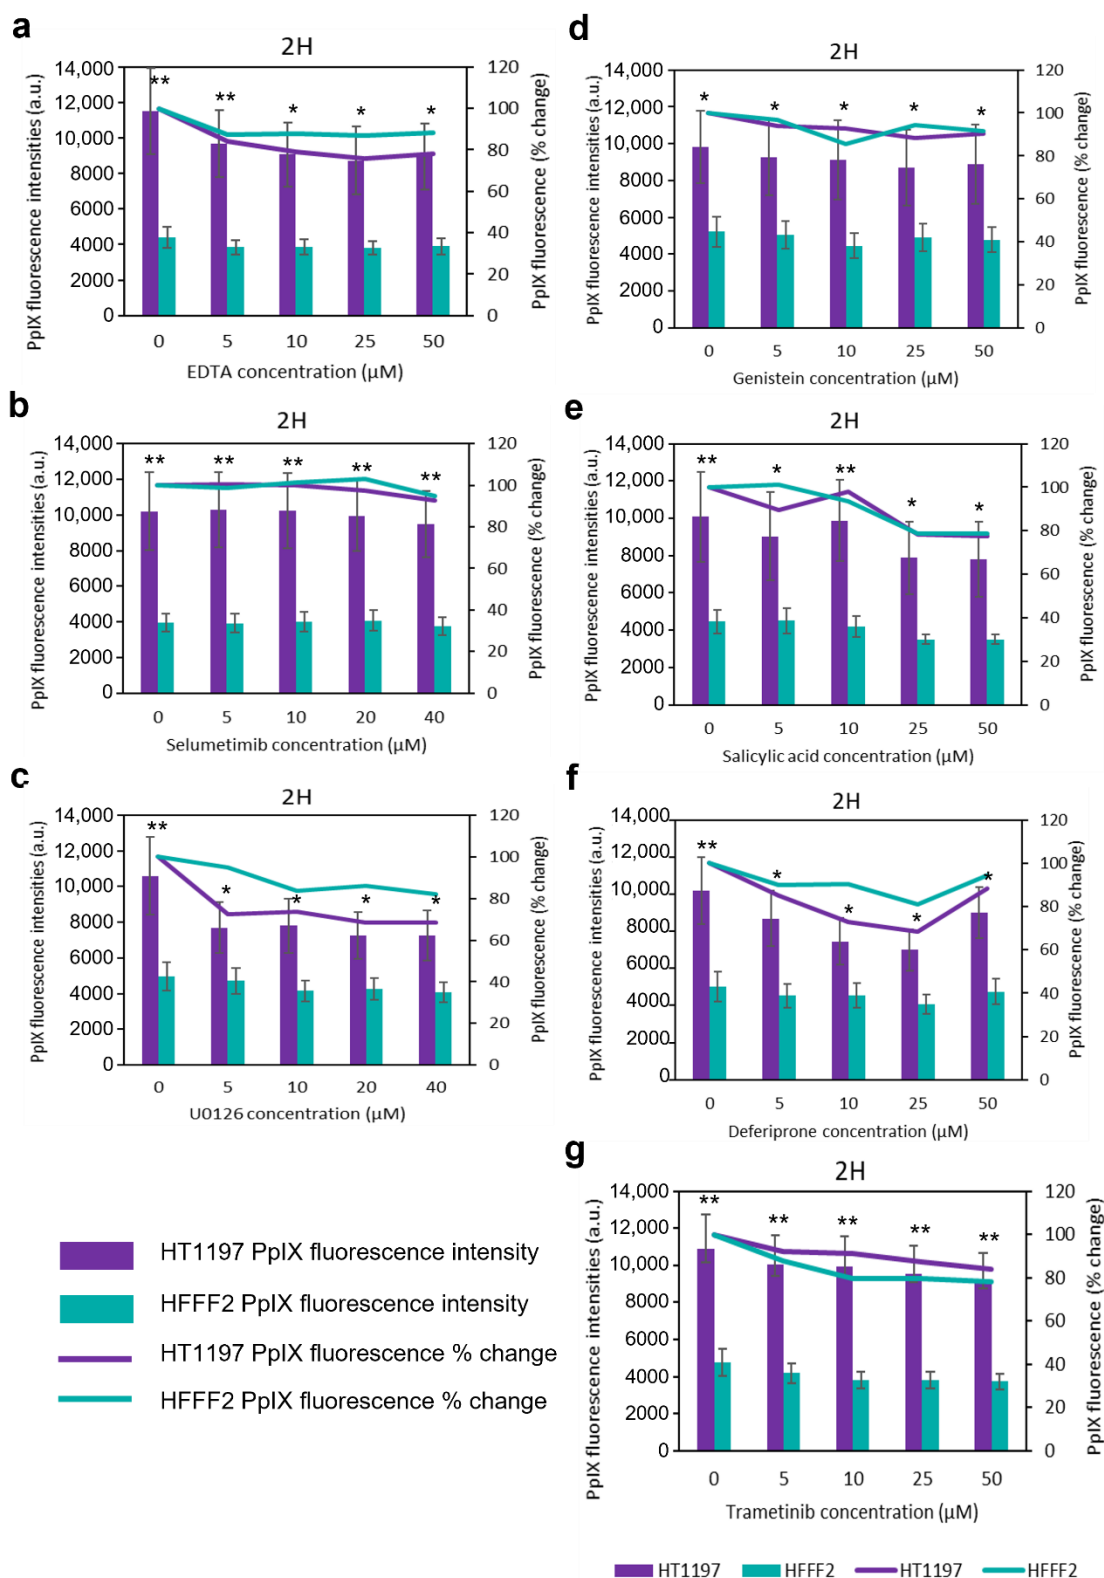

**Figure S1.** Mean PpIX fluorescence in bladder cancer (HT1197) and normal fibroblasts (HFFF2), treated with 50  $\mu\text{M}$  of HAL and drugs for 2 hours in 37°C. Statistical analysis was performed using two-tailed Welch's t-tests; \*  $p \leq 0.05$ ; \*\*  $p \leq 0.01$ .

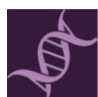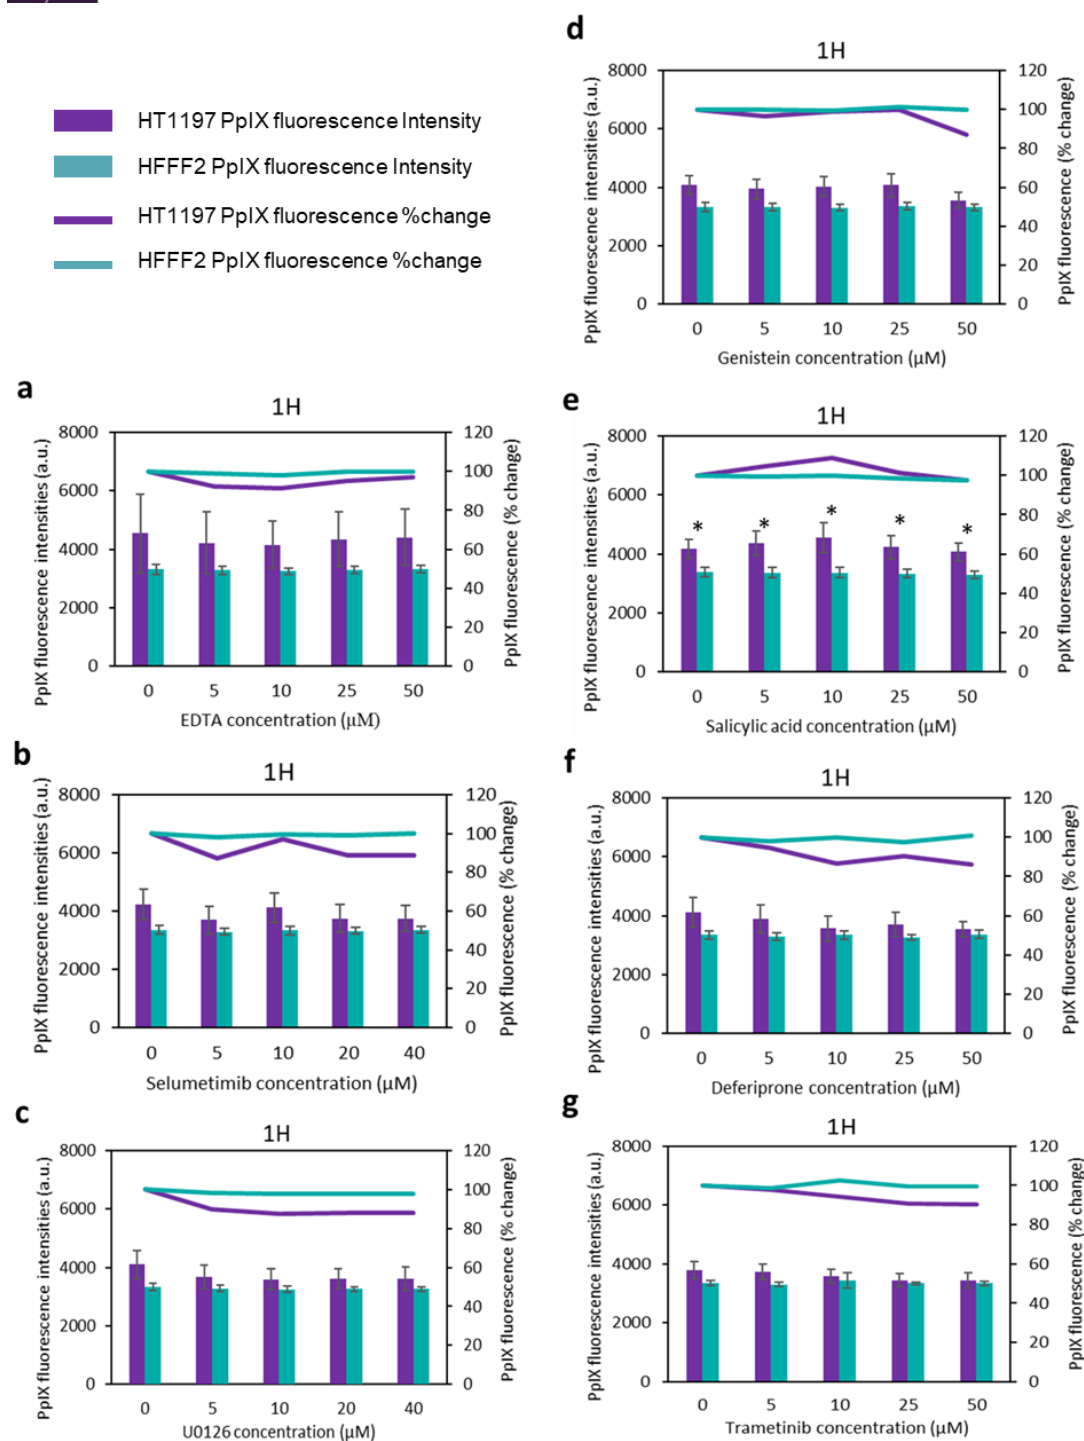

**Figure S2.** Mean PpIX fluorescence in bladder cancer (HT1197) and normal fibroblasts (HFFF2), treated with 50  $\mu\text{M}$  of HAL and drugs for 1 hour in 23°C. Statistical analysis was performed using two-tailed Welch's t-tests; \*  $p \leq 0.05$ .

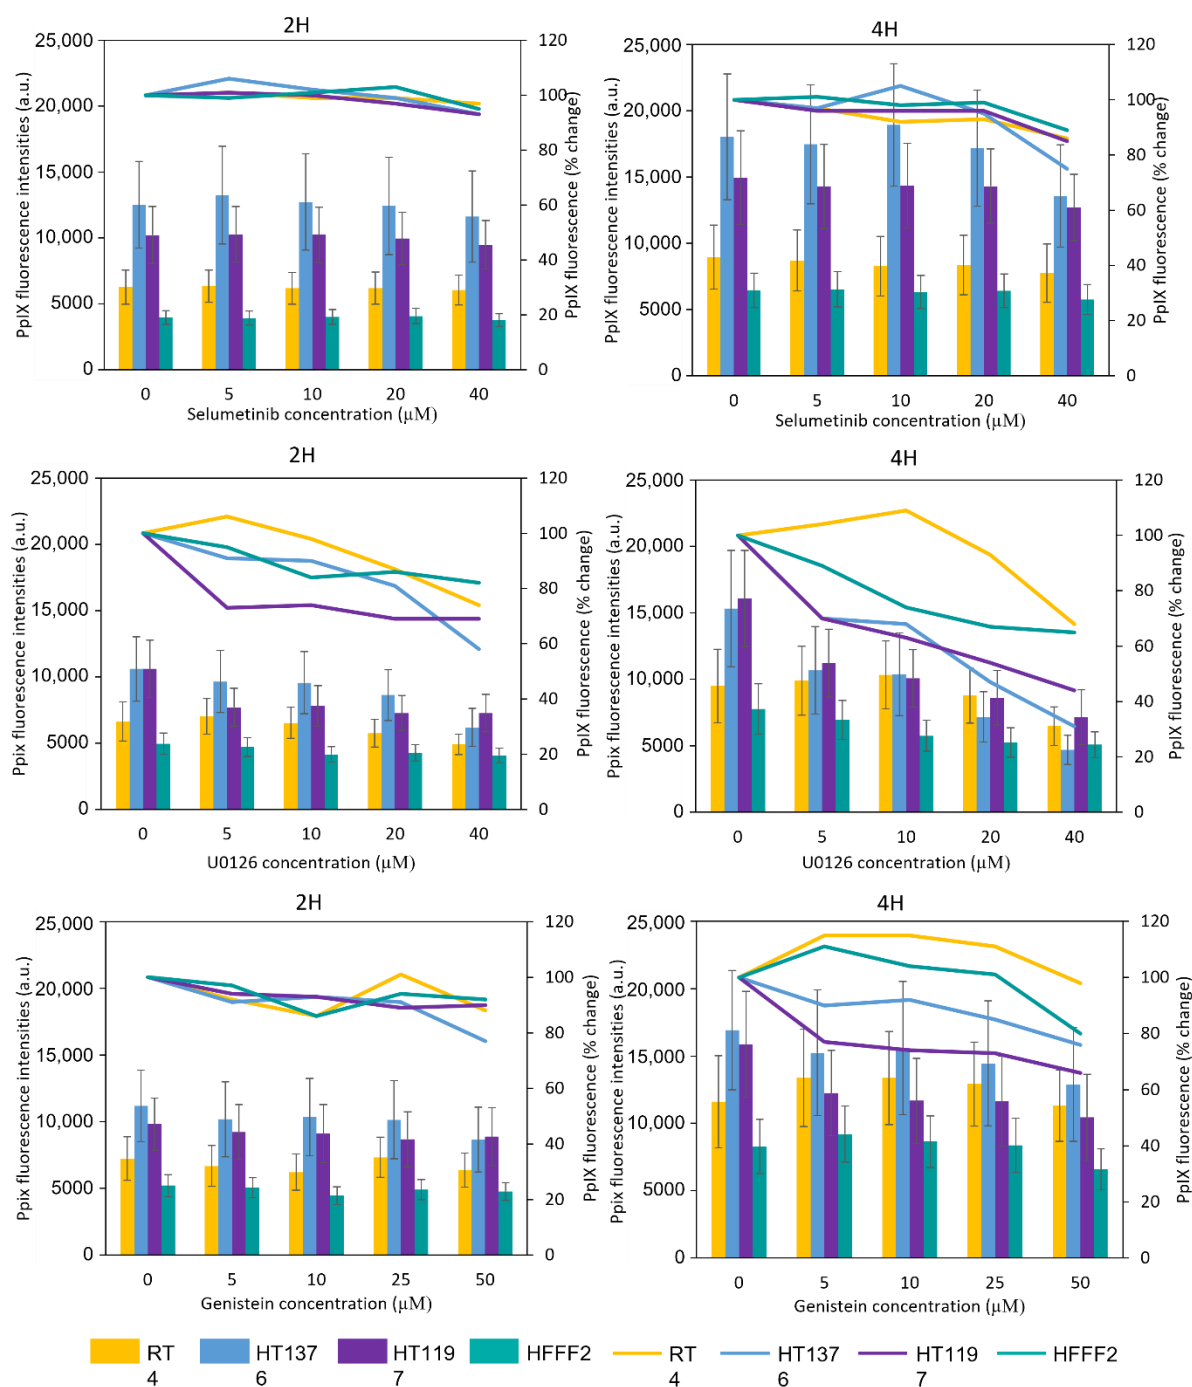

**Figure S3.** Mean PpIX fluorescence in bladder cancer (RT4, HT1376, HT1197) and normal fibroblasts (HFFF2), treated with 50  $\mu\text{M}$  of HAL and drugs for 2 and 4 hours in 37°C.
